# Supplementary material for: The effect of imidazolium cations on the structure and activity of the Candida antarctica Lipase B enzyme in ionic liquids
Source: Royal Society of Chemistry journal article supplement (doi:10.1039/c6cp02355j), 2016-01-01
Supplement: c6cp02355j1.pdf [file c6cp02355j1.pdf]

## Supporting Information

for

# Role of Imidazolium Cation on Structure and Activity of *Candida antarctica* Lipase B Enzyme in Ionic Liquids

Ho Shin Kim, Doyoung Eom, Yoon-Mo Koo, and Yaroslava G. Yingling

<sup>1</sup>Department of Materials Science and Engineering, North Carolina State University, Raleigh, North Carolina 27695-7907 (USA)

<sup>2</sup>Department of Biological Engineering, Inha University, Incheon 402-751 (Republic of Korea)

**Table S1.** Simulation setup

| Solvent     | Components          | Molecular Volume (Å <sup>3</sup> ) | Volume Ratio V <sub>a</sub> /V <sub>c</sub> | Volume of Simulation Box (Å <sup>3</sup> ) | Density from MD (g/ml) | Density from experiment (g/ml) |
|-------------|---------------------|------------------------------------|---------------------------------------------|--------------------------------------------|------------------------|--------------------------------|
| [Emim][TfO] | [Emim] <sup>+</sup> | 234.25                             | 0.71                                        | 192,151.21<br>(±121.28)                    | 1.39                   | 1.39 <sup>1</sup>              |
|             | [TfO] <sup>-</sup>  | 165.70                             |                                             |                                            |                        |                                |
| [Bmim][TfO] | [Bmim] <sup>+</sup> | 296.77                             | 0.56                                        | 205,552.22<br>(±109.61)                    | 1.32                   | 1.30 <sup>2</sup>              |
|             | [TfO] <sup>-</sup>  | 165.70                             |                                             |                                            |                        |                                |
| [Hmim][TfO] | [Hmim] <sup>+</sup> | 360.29                             | 0.46                                        | 251,349.19<br>(±204.87)                    | 1.25                   | 1.20 <sup>1</sup>              |
|             | [TfO] <sup>-</sup>  | 165.70                             |                                             |                                            |                        |                                |
| [Omim][TfO] | [Omim] <sup>+</sup> | 423.70                             | 0.39                                        | 277,985.43<br>(±83.18)                     | 1.21                   | 1.19 <sup>3</sup>              |
|             | [TfO] <sup>-</sup>  | 165.70                             |                                             |                                            |                        |                                |

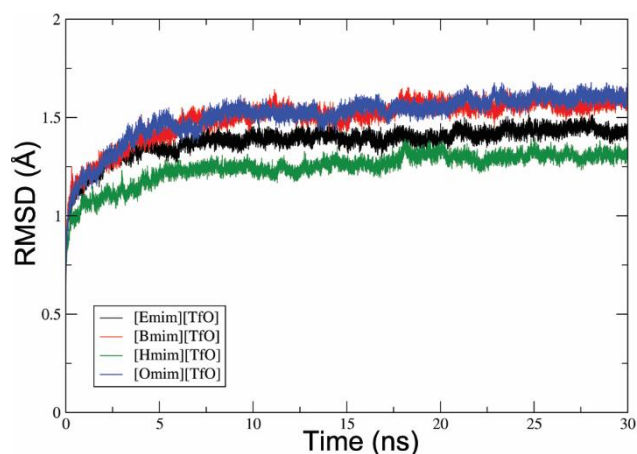

**Figure S1.** Root mean square deviation (RMSD) of CALB solvated in [Emim][TfO] (black), [Bmim][TfO] (Red), [Hmim][TfO] (Dark green) and [Omim][TfO] (Blue)

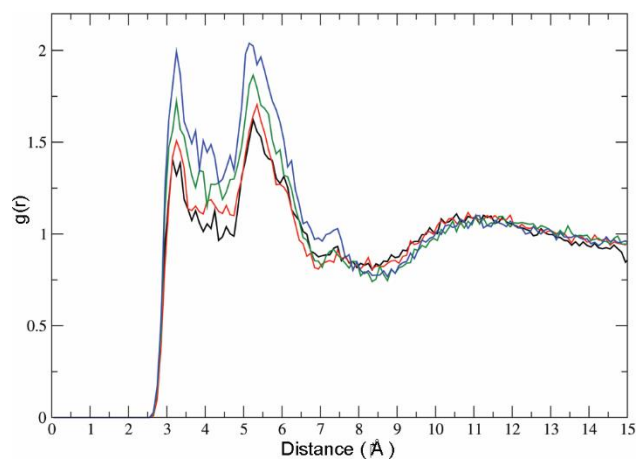

**Figure S2.** Radial distribution function of carbon atom in imidazolium cation. [Emim]<sup>+</sup> (black), [Bmim]<sup>+</sup> (red), [Hmim]<sup>+</sup> (green), and [Omim]<sup>+</sup> (blue). Second solvation shell (7 Å) is used for estimation of coordination number.

**Table S2.** Reaction rate of butyl acetate synthesis reaction using CALB in ILs

| Solvents    | Reaction Rate<br>(mol / L·hr) |
|-------------|-------------------------------|
| [Emim][TfO] | 0.20                          |
| [Bmim][TfO] | 0.85                          |
| [Hmim][TfO] | 0.77                          |
| [Omim][TfO] | 0.74                          |

**Table S3.** Secondary structure of  $\alpha$ -10 helix (residue 285 to 287) in ILs

| CALB in     | Residue | 3-10<br>Helix | Alpha<br>Helix | Turn   |
|-------------|---------|---------------|----------------|--------|
| [Emim][TfO] | 285 ILE | 1.469         | 83.668         | 13.756 |
|             | 286 VAL | 6.258         | 62.206         | 25.974 |
|             | 287 ALA | 6.312         | 27.957         | 42.023 |
| [Bmim][TfO] | 285 ILE | 0.043         | 99.887         | 0.370  |
|             | 286 VAL | 0.037         | 99.196         | 0.764  |
|             | 287 ALA | 0.086         | 80.785         | 11.383 |
| [Hmim][TfO] | 285 ILE | 0.697         | 99.141         | 0.162  |
|             | 286 VAL | 0.025         | 98.581         | 1.394  |
|             | 287 ALA | 0.019         | 90.414         | 5.123  |
| [Omim][TfO] | 285 ILE | 0.021         | 95.418         | 4.540  |
|             | 286 VAL | 0.127         | 94.087         | 5.744  |
|             | 287 ALA | 0.127         | 70.626         | 17.115 |

Each percentage value was calculated in consecutive frame of 30 ns simulations

## References

- (1) A. Berthod, M. Ruiz-Angel and S. Carda-Broch, J. Chromatogr. A, 1184, 6 (2008).
- (2) S. H. Lee and S. B. Lee, Chem. Commun., 3469 (2005).
- (3) S. H. Ha, N. L. Mai and Y.M. Koo, Process. Biochem., 45, 1899 (2010).
